# Supplementary material
Source: PubMed Central journal article supplement (PMC5744598)
Supplement: NIHMS901799-supplement-1.pdf [file NIHMS901799-supplement-1.pdf]

Supplementary materials for

## **Interactions between visual working memory representations**

Gi-Yeul Bae & Steven J. Luck

*Center for Mind & Brain and Department of Psychology  
University of California, Davis*

### Contents

1. Overview of supplement
2. Figure S1. Probability distributions of response errors in Experiment 1
3. Figure S2. Mu estimates from a mixture model with swap errors in Experiment 1
4. Figure S3. Kappa, PNT, and Guess estimates from a mixture model with swap errors in Experiment 1
5. Figure S4. Probability distributions of response errors in Experiment 1
6. Figure S5. Mu estimates from a mixture model with swap errors in Experiment 1
7. Figure S6. Kappa, PNT, and Guess estimates from a mixture model with swap errors in Experiment 1
8. Figure S7. Probability distributions of response errors in Experiment 1
9. Figure S8. Mu estimates from a mixture model with swap errors in Experiment 1
10. Figure S9. Kappa, PNT, and Guess estimates from a mixture model with swap errors in Experiment 1
11. Statistical analyses of Kappa estimates

## 1. Overview of supplement

There are many analytic approaches available for quantifying performance in visual working memory tasks using delayed estimation. The main paper uses an approach that is simple and requires minimal assumptions. Here, we provide the raw probability distributions and the results of analyses using a more sophisticated mathematical model to quantify performance. The model was based on the mixture model of Bays, Catalao, and Husain (2009). This model conceives of visual working memory as a set of normally distributed representations on a circular space, each with a mean value that can be shifted systematically away from the true orientation of the sample stimulus. It also assumes that the observer may occasionally confuse the first and second items on a given trial and report the wrong one (“swap errors”). Because the set size was low (two items) and constant, and the analyses focused on the mean value of the distribution rather than its shape, there are no meaningful differences between this model and other common models of visual working memory in the context of the present experiment.

The model can be expressed as this equation:

$$p(\hat{\theta}) = P_T * \Phi(\hat{\theta}, \theta_T + \mu, \kappa) + P_{NT} * \Phi(\hat{\theta}, \theta_{NT}, \kappa) + (1 - P_T - P_{NT}) * \frac{1}{2\pi}.$$

In this model,  $p(\hat{\theta})$  represents the estimated probability of making a response at a particular orientation. There are four free parameters in the model.  $P_T$  represents proportion of responses based on the cued target.  $P_{NT}$  represents proportion of trials with swap errors, on which the observer erroneously reports the uncued target (*nontarget responses*). The observer may also fail to report either the cued target or the uncued target (with a probability of  $1 - P_T - P_{NT}$ ) and instead make a completely random guess. Kappa ( $\kappa$ ) is the concentration parameter of a circular normal (von Mises) distribution ( $\Phi$ ), which represents the precision of the report. Mu ( $\mu$ ) is the central tendency of the von Mises distribution ( $\Phi$ ) for target-based responses, which represents systematic shifts of the representation away from the true value. Mu ( $\mu$ ) is negative if the response to the cued target is in the direction of the uncued target (attraction) and positive if the response is away from the uncued target (repulsion). The Mu ( $\mu$ ) parameter is analogous to the mean response error that was the focus of the main analyses. Maximum likelihood estimates of each parameter were obtained using a non-linear optimization algorithm (Nelder & Mead, 1965), separately for each participant and the orientation difference. To ensure that global maxima were found, the optimization was repeated with multiple different initial parameter values.

## 2. Probability distributions of response errors in Experiment 1

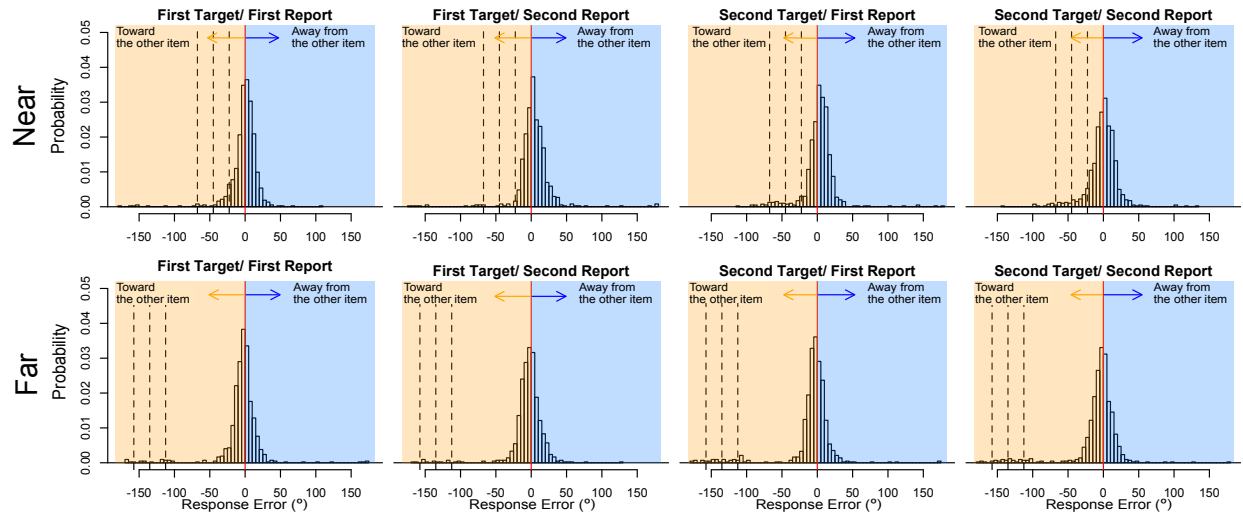

**Fig. S1** Probability distributions of response errors (collapsed across participants) from Experiment 1 for each combination of presentation and report order for trials in which the difference in orientation between the two targets was either *near* ( $22.5^\circ$ ,  $45^\circ$ , and  $67.5^\circ$ , top row) or *far* ( $112.5^\circ$ ,  $135^\circ$ , and  $157.5^\circ$ , bottom row). The *vertical red line* in each panel indicates the actual orientation of the target item being reported, and the *broken black lines* indicate the possible positions of the other target. On *near trials*, there were clearly more responses on the opposite side of orientation space from the other target (*blue region*; repulsion bias). On *far trials*, there were clearly more responses on the same side as the other target (*orange region*; attraction bias). It is also clear that participants made occasional responses at the orientation of the wrong target (the orientations indicated by the *vertical black lines*).

### 3. $\mu$ estimates from a mixture model with swap errors in Experiment 1

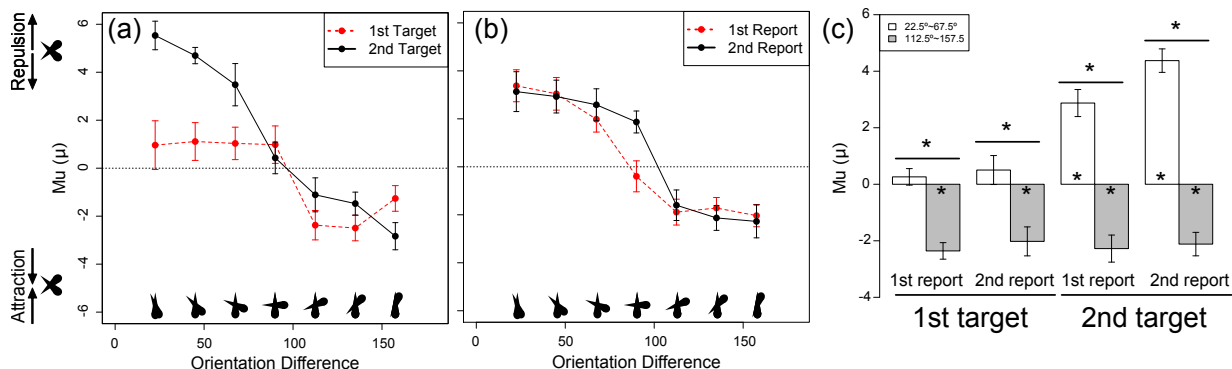

**Fig. S2** **a** Mean  $\mu$  ( $\mu$ ) estimates as a function of the orientation difference for the first and second target (collapsed across report order) and **b** for the first and second report (collapsed across presentation order). Positive values indicate bias away from the uncued target (repulsion) and negative values indicates bias toward the uncued target (attraction). **c** Mean  $\mu$  estimates for the *near* and the *far* conditions for each combination of the presentation and the report order, collapsed into near and far conditions. *Error bars* show the within-subjects standard error of the mean (Morey, 2008). \*  $p < .05$ , FDR corrected

### 4. $\kappa$ , $P_{NT}$ , and Guess estimates from a mixture model with swap errors in Experiment 1

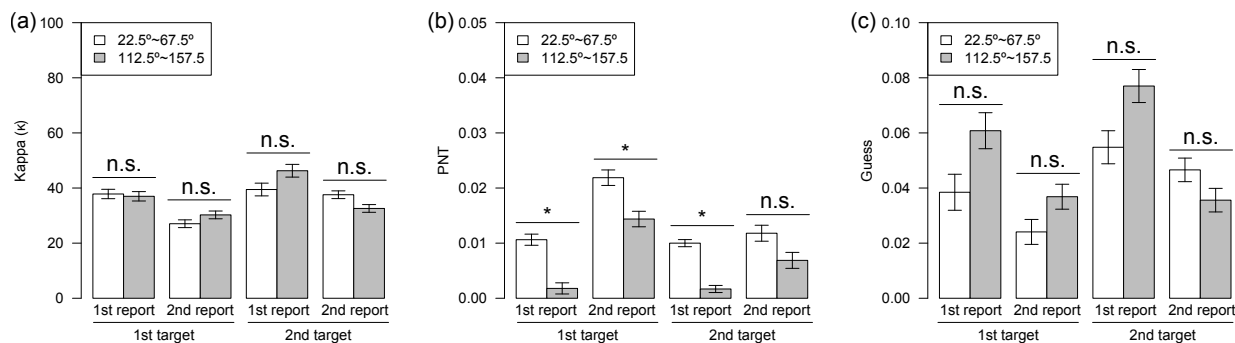

**Fig. S3** **a** Mean Kappa, **b** mean  $P_{NT}$ , and **c** mean Guess estimates for each combination of presentation and report order, collapsed into the *near* and the *far* conditions. There were no significant differences in Kappa between the *near* and *far* conditions. There were more swap errors (i.e., a greater mean  $P_{NT}$ ) in the *near* condition than in the *far* condition. There tended to be more guess responses in the *far* condition than in the *near* condition, but guess rates were very low and the differences among conditions were not significant. *Error bars* show the within-subjects standard error of the mean. \*  $p < .05$ , FDR corrected

5. Probability distribution of response errors in Experiment 2

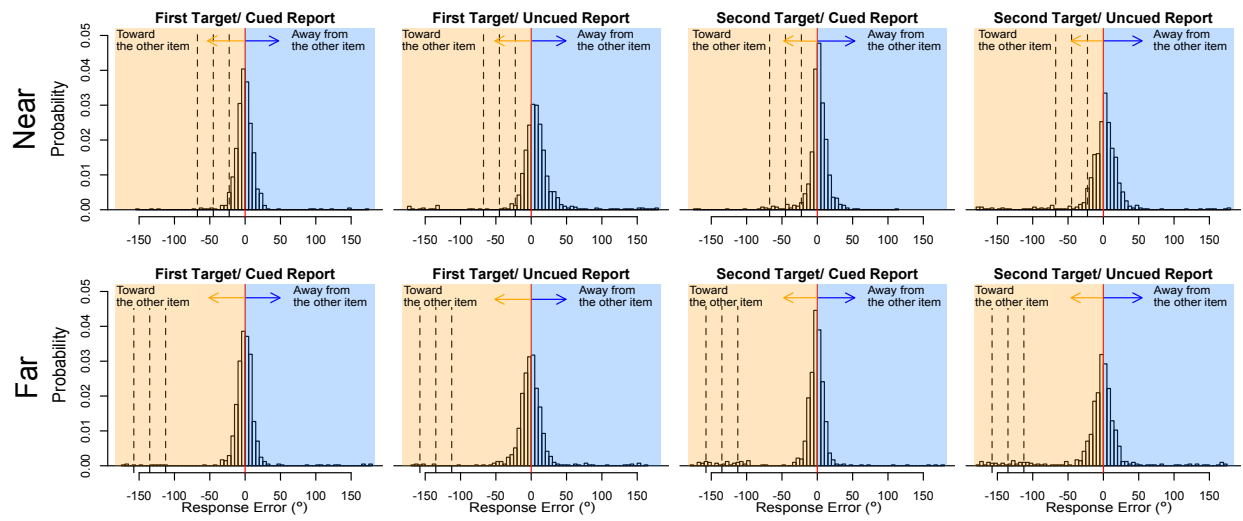

Fig. S4 Probability distributions of response errors in Experiment 2, organized as in Fig. S1

6.  $\mu$  estimates from a mixture model with swap errors in Experiment 2

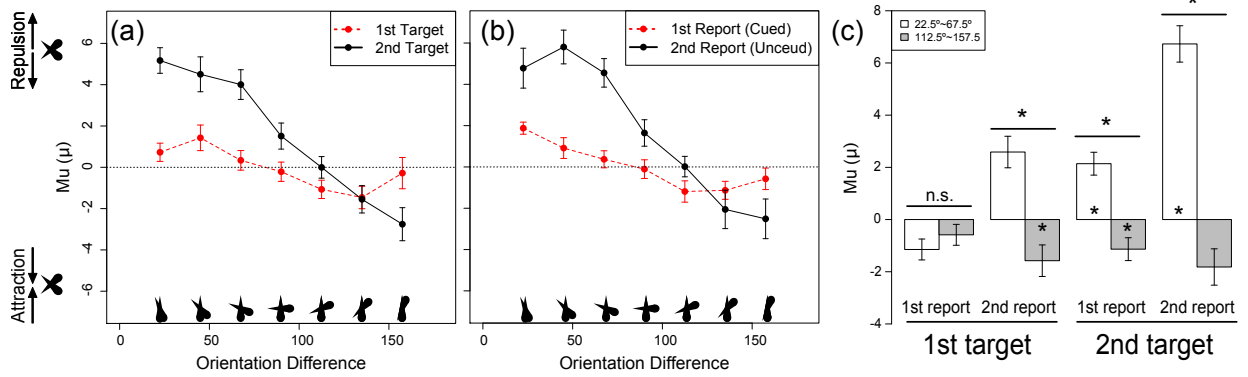

**Fig. S5** Mean  $\mu$  ( $\mu$ ) estimates in Experiment 2, organized as in **Fig. S2**

7.  $Kappa$ ,  $P_{NT}$ , and Guess estimates from a mixture model with swap errors in Experiment 2

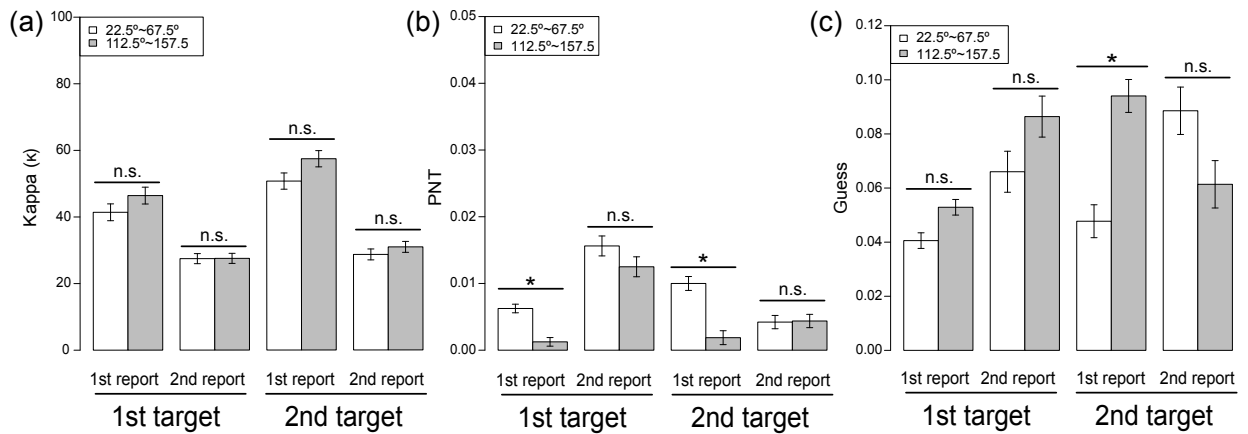

**Fig. S6 a** Mean  $Kappa$ , **b** mean  $P_{NT}$ , and **c** mean  $Guess$  estimates in Experiment 2, organized as in **Fig. S3**

8. Probability distribution of response errors in Experiment 3

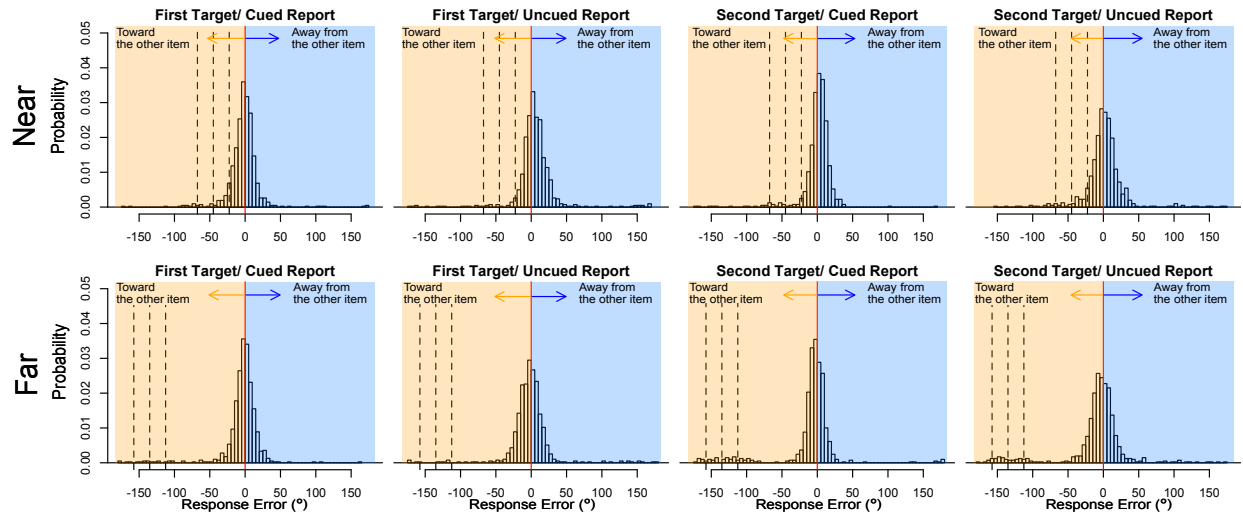

Fig. S7 Probability distributions of response errors in Experiment 3, organized as in Fig. S1

### 9. $\mu$ estimates from a mixture model with swap errors in Experiment 3

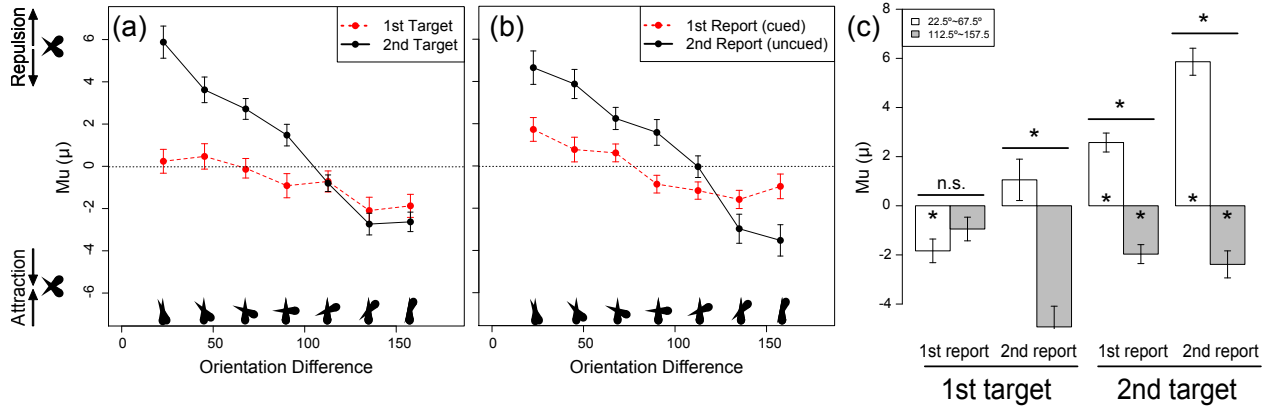

**Fig. S8** Mean  $\mu$  ( $\mu$ ) estimates in Experiment 3, organized as in **Fig. S2**

### 10. $\kappa$ , $P_{NT}$ , and Guess estimates from a mixture model with swap errors in Experiment 3

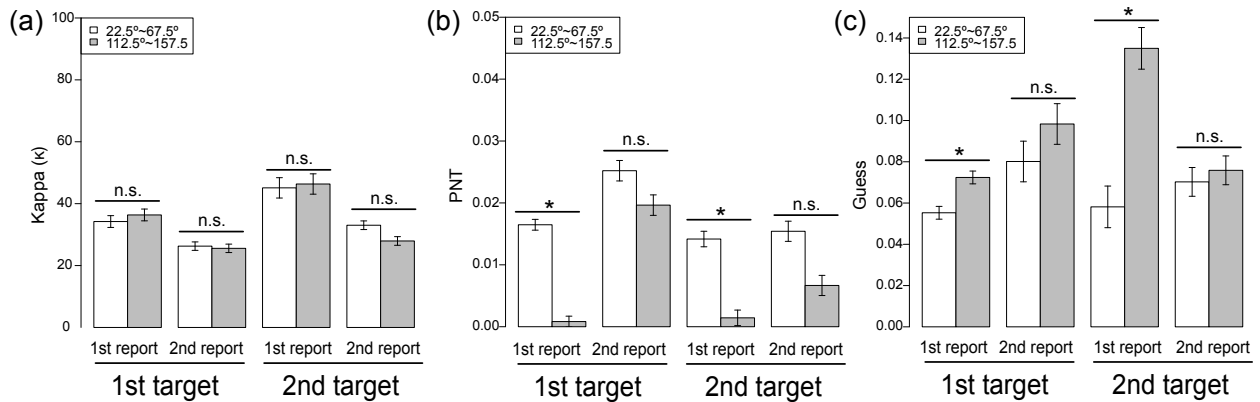

**Fig. S9** **a** Mean  $\kappa$ , **b** mean  $P_{NT}$ , and **c** mean Guess estimates in Experiment 3, organized as in **Fig. S3**

### 11. Statistical analyses of $\kappa$ estimates

We conducted statistical analyses to test whether the precision of a representation (quantified as the kappa value from the mixture model) was influenced by the attentional cues in Experiment 2 and 3. Because the cued item was always tested first and the uncued item was always tested second, a direct comparison of the cued and uncued items would be confounded by report order. We therefore compared the kappa estimates for the cued and uncued items in Experiments 2 and 3 with the kappa estimates from the first- and second-reported items in Experiment 1. Specifically, we conducted two separate two-way ANOVAs with a within-subject factor of



report order/cuing (Report 1: cued vs. Report 2: uncued) and a between-subject factor of experiment (Experiment 1 vs. 2 and Experiment 1 vs. 3). In the ANOVA with Experiment 1 versus 2, the two-way interaction was significant,  $F(1, 30) = 11.18, p = .002, \eta_p^2 = 0.27$ , indicating that precued items were maintained in memory with higher precision compared with unprecued items (precued: 51.73 vs. unprecued: 29.66). In the ANOVA with Experiment 1 versus 3, the two-way interaction was not significant ( $F < 1$ ), suggesting that postcue did not increase the precision of the representation.

## References

- Bays, P.M., Catalao, R.F.G., & Husain, M. (2009). The precision of visual working memory is set by allocation of a shared resource. *Journal of Vision, 9*, 1-11.
- Morey, R. D. (2008). Confidence intervals from normalized data: A correction to Cousineau (2005). *Tutorial in Quantitative Methods for Psychology, 4*, 61-64.
- Nelder, J. A., & Mead, R. (1965). A simplex method for function minimization. *The computer journal, 7*(4), 308-313.
